# Supplementary material for: Structured Life Narratives: Building Life Story Hierarchies with Graph-Enhanced Event Feature Refinement
Source: MDPI journal article supplement (doi:10.3390/app14020918), 2024-01-22
Supplement: s1 [file s1]

Table S1. The statistical results of each participant's scores on Question 3.

| P1           |       |       |       |       |       |       |       |      |      |
|--------------|-------|-------|-------|-------|-------|-------|-------|------|------|
| Method       | 1(%)  | 2(%)  | 3(%)  | 4(%)  | 5(%)  | 6(%)  | 7(%)  | M    | SD   |
| LDA+TO       | 10.99 | 10.99 | 9.55  | 24.86 | 18.20 | 17.12 | 8.29  | 4.13 | 1.77 |
| Story Forest | 6.68  | 13.22 | 9.62  | 21.20 | 18.16 | 21.20 | 9.91  | 4.34 | 1.74 |
| EventKG      | 3.26  | 6.49  | 12.96 | 27.92 | 27.00 | 15.38 | 6.99  | 4.43 | 1.42 |
| EventNET     | 4.20  | 7.42  | 10.14 | 20.40 | 21.76 | 22.25 | 13.84 | 4.70 | 1.62 |
| LSH-GEFR     | 2.47  | 2.84  | 8.90  | 18.54 | 23.24 | 29.91 | 14.09 | 5.03 | 1.43 |
| P2           |       |       |       |       |       |       |       |      |      |
| Method       | 1(%)  | 2(%)  | 3(%)  | 4(%)  | 5(%)  | 6(%)  | 7(%)  | M    | SD   |
| LDA+TO       | 9.55  | 9.55  | 14.05 | 24.68 | 17.66 | 17.12 | 7.39  | 4.12 | 1.70 |
| Story Forest | 6.94  | 13.55 | 11.55 | 19.21 | 18.82 | 19.67 | 10.27 | 4.30 | 1.76 |
| EventKG      | 2.90  | 6.83  | 13.79 | 27.28 | 27.81 | 13.93 | 7.47  | 4.42 | 1.42 |
| EventNET     | 5.32  | 6.30  | 12.48 | 20.02 | 20.89 | 22.13 | 12.86 | 4.63 | 1.65 |
| LSH-GEFR     | 2.84  | 5.69  | 7.05  | 15.45 | 23.86 | 28.55 | 16.56 | 5.04 | 1.53 |
| P3           |       |       |       |       |       |       |       |      |      |
| Method       | 1(%)  | 2(%)  | 3(%)  | 4(%)  | 5(%)  | 6(%)  | 7(%)  | M    | SD   |
| LDA+TO       | 8.65  | 12.25 | 11.71 | 25.23 | 19.64 | 14.05 | 8.47  | 4.11 | 1.70 |
| Story Forest | 6.22  | 12.83 | 11.55 | 20.09 | 18.82 | 21.01 | 9.49  | 4.33 | 1.72 |
| EventKG      | 3.26  | 7.08  | 13.12 | 27.61 | 27.11 | 14.57 | 7.24  | 4.41 | 1.43 |
| EventNET     | 3.83  | 5.56  | 11.37 | 22.13 | 23.36 | 22.37 | 11.37 | 4.68 | 1.54 |
| LSH-GEFR     | 4.08  | 2.97  | 10.26 | 15.08 | 25.59 | 26.33 | 15.70 | 4.97 | 1.54 |
| P4           |       |       |       |       |       |       |       |      |      |
| Method       | 1(%)  | 2(%)  | 3(%)  | 4(%)  | 5(%)  | 6(%)  | 7(%)  | M    | SD   |
| LDA+TO       | 8.47  | 10.81 | 12.43 | 24.50 | 21.08 | 16.22 | 6.49  | 4.14 | 1.66 |
| Story Forest | 5.76  | 13.65 | 12.34 | 20.65 | 17.51 | 20.78 | 9.33  | 4.30 | 1.72 |
| EventKG      | 3.01  | 6.88  | 12.98 | 29.34 | 25.38 | 14.66 | 7.75  | 4.42 | 1.43 |
| EventNET     | 3.83  | 6.18  | 10.01 | 20.77 | 20.89 | 23.49 | 14.83 | 4.78 | 1.60 |

|              |       |       |       |       |       |       |       |      |      |
|--------------|-------|-------|-------|-------|-------|-------|-------|------|------|
| LSH-GEFR     | 3.09  | 2.84  | 8.90  | 16.81 | 24.10 | 25.96 | 18.29 | 5.07 | 1.50 |
| P5           |       |       |       |       |       |       |       |      |      |
| Method       | 1(%)  | 2(%)  | 3(%)  | 4(%)  | 5(%)  | 6(%)  | 7(%)  | M    | SD   |
| LDA+TO       | 10.09 | 12.61 | 12.61 | 18.56 | 17.66 | 19.10 | 9.37  | 4.16 | 1.82 |
| Story Forest | 5.86  | 14.10 | 10.90 | 21.01 | 18.91 | 21.01 | 8.21  | 4.29 | 1.70 |
| EventKG      | 2.79  | 6.60  | 13.40 | 28.11 | 26.14 | 15.63 | 7.33  | 4.44 | 1.41 |
| EventNET     | 4.45  | 7.17  | 10.26 | 21.76 | 21.63 | 21.63 | 13.10 | 4.66 | 1.62 |
| LSH-GEFR     | 2.84  | 2.72  | 9.02  | 18.17 | 24.10 | 26.45 | 16.69 | 5.04 | 1.47 |
| P6           |       |       |       |       |       |       |       |      |      |
| Method       | 1(%)  | 2(%)  | 3(%)  | 4(%)  | 5(%)  | 6(%)  | 7(%)  | M    | SD   |
| LDA+TO       | 10.81 | 11.53 | 12.61 | 23.42 | 19.46 | 13.69 | 8.47  | 4.04 | 1.75 |
| Story Forest | 5.46  | 14.30 | 11.55 | 20.45 | 18.68 | 19.50 | 10.05 | 4.31 | 1.72 |
| EventKG      | 3.18  | 6.60  | 13.49 | 26.39 | 28.17 | 14.60 | 7.58  | 4.44 | 1.43 |
| EventNET     | 4.33  | 5.81  | 10.63 | 24.85 | 18.42 | 22.37 | 13.60 | 4.69 | 1.60 |
| LSH-GEFR     | 3.34  | 3.09  | 7.29  | 16.07 | 24.10 | 29.67 | 16.44 | 5.09 | 1.49 |
| P7           |       |       |       |       |       |       |       |      |      |
| Method       | 1(%)  | 2(%)  | 3(%)  | 4(%)  | 5(%)  | 6(%)  | 7(%)  | M    | SD   |
| LDA+TO       | 10.63 | 13.51 | 10.09 | 22.70 | 18.74 | 17.12 | 7.21  | 4.06 | 1.77 |
| Story Forest | 6.71  | 12.86 | 11.71 | 19.18 | 19.01 | 19.86 | 10.67 | 4.33 | 1.75 |
| EventKG      | 3.32  | 6.83  | 13.32 | 28.03 | 27.22 | 14.04 | 7.24  | 4.40 | 1.42 |
| EventNET     | 4.45  | 7.05  | 10.26 | 20.40 | 22.50 | 22.99 | 12.36 | 4.68 | 1.61 |
| LSH-GEFR     | 3.58  | 2.84  | 9.15  | 15.95 | 22.25 | 28.43 | 17.80 | 5.07 | 1.53 |
| P8           |       |       |       |       |       |       |       |      |      |
| Method       | 1(%)  | 2(%)  | 3(%)  | 4(%)  | 5(%)  | 6(%)  | 7(%)  | M    | SD   |
| LDA+TO       | 11.35 | 12.43 | 12.79 | 24.86 | 15.86 | 14.95 | 7.75  | 3.97 | 1.76 |
| Story Forest | 6.81  | 13.48 | 11.71 | 20.39 | 17.90 | 20.52 | 9.20  | 4.27 | 1.74 |
| EventKG      | 3.37  | 5.85  | 14.63 | 27.58 | 26.30 | 14.41 | 7.86  | 4.42 | 1.43 |
| EventNET     | 4.08  | 6.92  | 9.64  | 18.79 | 23.36 | 23.61 | 13.60 | 4.76 | 1.60 |
| LSH-GEFR     | 3.09  | 3.46  | 7.42  | 12.61 | 26.82 | 29.05 | 17.55 | 5.14 | 1.48 |

| P9           |       |       |       |       |       |       |       |      |      |
|--------------|-------|-------|-------|-------|-------|-------|-------|------|------|
| Method       | 1(%)  | 2(%)  | 3(%)  | 4(%)  | 5(%)  | 6(%)  | 7(%)  | M    | SD   |
| LDA+TO       | 6.31  | 11.89 | 10.81 | 25.23 | 22.70 | 14.05 | 9.01  | 4.24 | 1.64 |
| Story Forest | 6.22  | 14.76 | 11.19 | 20.39 | 18.39 | 19.54 | 9.52  | 4.27 | 1.74 |
| EventKG      | 3.29  | 7.16  | 14.29 | 27.39 | 26.27 | 14.46 | 7.13  | 4.38 | 1.44 |
| EventNET     | 5.32  | 6.18  | 11.25 | 19.16 | 19.53 | 23.49 | 15.08 | 4.72 | 1.68 |
| LSH-GEFR     | 1.85  | 3.83  | 8.53  | 15.08 | 25.96 | 26.70 | 18.05 | 5.12 | 1.45 |
| P10          |       |       |       |       |       |       |       |      |      |
| Method       | 1(%)  | 2(%)  | 3(%)  | 4(%)  | 5(%)  | 6(%)  | 7(%)  | M    | SD   |
| LDA+TO       | 11.71 | 13.51 | 9.55  | 24.68 | 18.38 | 13.51 | 8.65  | 4.00 | 1.79 |
| Story Forest | 6.97  | 13.42 | 11.09 | 20.29 | 18.36 | 20.68 | 9.20  | 4.28 | 1.74 |
| EventKG      | 3.20  | 7.80  | 13.82 | 27.22 | 27.00 | 13.99 | 6.97  | 4.37 | 1.44 |
| EventNET     | 4.20  | 8.53  | 9.52  | 19.28 | 22.87 | 21.88 | 13.72 | 4.69 | 1.64 |
| LSH-GEFR     | 2.60  | 3.34  | 7.91  | 16.44 | 22.00 | 28.31 | 19.41 | 5.14 | 1.49 |
| P11          |       |       |       |       |       |       |       |      |      |
| Method       | 1(%)  | 2(%)  | 3(%)  | 4(%)  | 5(%)  | 6(%)  | 7(%)  | M    | SD   |
| LDA+TO       | 10.27 | 12.43 | 8.11  | 27.57 | 20.00 | 14.59 | 7.03  | 4.06 | 1.71 |
| Story Forest | 5.89  | 13.25 | 11.78 | 21.20 | 18.39 | 20.26 | 9.23  | 4.31 | 1.71 |
| EventKG      | 3.01  | 6.88  | 12.90 | 27.61 | 28.06 | 14.71 | 6.83  | 4.42 | 1.41 |
| EventNET     | 4.94  | 6.80  | 10.75 | 20.77 | 22.25 | 21.88 | 12.61 | 4.65 | 1.62 |
| LSH-GEFR     | 3.58  | 3.96  | 8.16  | 15.33 | 24.23 | 27.81 | 16.93 | 5.04 | 1.54 |
| P12          |       |       |       |       |       |       |       |      |      |
| Method       | 1(%)  | 2(%)  | 3(%)  | 4(%)  | 5(%)  | 6(%)  | 7(%)  | M    | SD   |
| LDA+TO       | 9.55  | 11.89 | 11.35 | 23.06 | 20.18 | 15.86 | 8.11  | 4.12 | 1.73 |
| Story Forest | 6.64  | 13.06 | 11.78 | 21.01 | 18.26 | 19.50 | 9.75  | 4.29 | 1.73 |
| EventKG      | 3.43  | 6.60  | 13.15 | 27.31 | 28.36 | 13.35 | 7.80  | 4.42 | 1.43 |
| EventNET     | 3.58  | 6.06  | 11.12 | 20.52 | 22.62 | 23.11 | 12.98 | 4.74 | 1.57 |
| LSH-GEFR     | 3.58  | 4.33  | 9.64  | 15.57 | 25.34 | 25.09 | 16.44 | 4.96 | 1.55 |

Table S2. The statistical results of each participant's scores on Question 4.

| P1           |       |       |       |       |       |       |       |      |      |
|--------------|-------|-------|-------|-------|-------|-------|-------|------|------|
| Method       | 1(%)  | 2(%)  | 3(%)  | 4(%)  | 5(%)  | 6(%)  | 7(%)  | M    | SD   |
| LDA+TO       | 6.90  | 3.45  | 9.48  | 26.72 | 35.34 | 12.93 | 5.17  | 4.40 | 1.43 |
| Story Forest | 10.34 | 10.34 | 15.52 | 27.59 | 17.24 | 12.07 | 6.90  | 3.95 | 1.67 |
| EventKG      | 9.48  | 11.21 | 12.93 | 15.52 | 26.72 | 18.10 | 6.03  | 4.17 | 1.71 |
| EventNET     | 3.45  | 6.90  | 6.90  | 21.55 | 20.69 | 23.28 | 17.24 | 4.88 | 1.60 |
| LSH-GEFR     | 7.76  | 4.31  | 10.34 | 15.52 | 20.69 | 25.00 | 16.38 | 4.78 | 1.75 |
| P2           |       |       |       |       |       |       |       |      |      |
| Method       | 1(%)  | 2(%)  | 3(%)  | 4(%)  | 5(%)  | 6(%)  | 7(%)  | M    | SD   |
| LDA+TO       | 2.59  | 5.17  | 16.38 | 23.28 | 31.03 | 17.24 | 4.31  | 4.44 | 1.34 |
| Story Forest | 9.48  | 12.07 | 14.66 | 25.86 | 12.07 | 18.10 | 7.76  | 4.04 | 1.74 |
| EventKG      | 11.21 | 11.21 | 7.76  | 27.59 | 22.41 | 14.66 | 5.17  | 4.03 | 1.68 |
| EventNET     | 9.48  | 11.21 | 12.93 | 14.66 | 11.21 | 20.69 | 19.83 | 4.48 | 1.98 |
| LSH-GEFR     | 3.45  | 6.03  | 8.62  | 14.66 | 23.28 | 25.00 | 18.97 | 4.99 | 1.61 |
| P3           |       |       |       |       |       |       |       |      |      |
| Method       | 1(%)  | 2(%)  | 3(%)  | 4(%)  | 5(%)  | 6(%)  | 7(%)  | M    | SD   |
| LDA+TO       | 3.45  | 0.86  | 18.10 | 28.45 | 28.45 | 17.24 | 3.45  | 4.43 | 1.27 |
| Story Forest | 8.62  | 12.93 | 13.79 | 20.69 | 18.10 | 15.52 | 10.34 | 4.15 | 1.77 |
| EventKG      | 6.90  | 8.62  | 15.52 | 27.59 | 15.52 | 16.38 | 9.48  | 4.23 | 1.65 |
| EventNET     | 5.17  | 10.34 | 14.66 | 12.93 | 18.10 | 19.83 | 18.97 | 4.64 | 1.82 |
| LSH-GEFR     | 3.45  | 4.31  | 12.07 | 12.07 | 25.00 | 22.41 | 20.69 | 5.01 | 1.61 |
| P4           |       |       |       |       |       |       |       |      |      |
| Method       | 1(%)  | 2(%)  | 3(%)  | 4(%)  | 5(%)  | 6(%)  | 7(%)  | M    | SD   |
| LDA+TO       | 5.17  | 10.34 | 12.93 | 29.31 | 22.41 | 11.21 | 8.62  | 4.22 | 1.55 |
| Story Forest | 6.90  | 10.34 | 18.97 | 19.83 | 15.52 | 22.41 | 6.03  | 4.18 | 1.67 |
| EventKG      | 8.62  | 9.48  | 11.21 | 27.59 | 20.69 | 14.66 | 7.76  | 4.17 | 1.65 |
| EventNET     | 5.17  | 11.21 | 11.21 | 16.38 | 15.52 | 20.69 | 19.83 | 4.67 | 1.83 |

|              |       |       |       |       |       |       |       |      |      |
|--------------|-------|-------|-------|-------|-------|-------|-------|------|------|
| LSH-GEFR     | 6.03  | 6.90  | 12.93 | 19.83 | 15.52 | 20.69 | 18.10 | 4.66 | 1.77 |
| P5           |       |       |       |       |       |       |       |      |      |
| Method       | 1(%)  | 2(%)  | 3(%)  | 4(%)  | 5(%)  | 6(%)  | 7(%)  | M    | SD   |
| LDA+TO       | 6.90  | 4.31  | 14.66 | 27.59 | 21.55 | 14.66 | 10.34 | 4.38 | 1.59 |
| Story Forest | 11.21 | 15.52 | 12.07 | 25.00 | 8.62  | 19.83 | 7.76  | 3.95 | 1.82 |
| EventKG      | 12.93 | 12.07 | 15.52 | 22.41 | 18.97 | 12.07 | 6.03  | 3.83 | 1.73 |
| EventNET     | 4.31  | 11.21 | 12.93 | 13.79 | 19.83 | 19.83 | 18.10 | 4.66 | 1.78 |
| LSH-GEFR     | 5.17  | 2.59  | 8.62  | 21.55 | 19.83 | 22.41 | 19.83 | 4.95 | 1.62 |
| P6           |       |       |       |       |       |       |       |      |      |
| Method       | 1(%)  | 2(%)  | 3(%)  | 4(%)  | 5(%)  | 6(%)  | 7(%)  | M    | SD   |
| LDA+TO       | 5.17  | 7.76  | 12.93 | 28.45 | 25.86 | 13.79 | 6.03  | 4.28 | 1.48 |
| Story Forest | 8.62  | 17.24 | 16.38 | 16.38 | 15.52 | 18.10 | 7.76  | 3.98 | 1.79 |
| EventKG      | 12.07 | 11.21 | 11.21 | 20.69 | 17.24 | 14.66 | 12.93 | 4.16 | 1.88 |
| EventNET     | 4.31  | 8.62  | 7.76  | 17.24 | 16.38 | 25.00 | 20.69 | 4.91 | 1.74 |
| LSH-GEFR     | 6.03  | 6.03  | 7.76  | 14.66 | 24.14 | 24.14 | 17.24 | 4.86 | 1.70 |
| P7           |       |       |       |       |       |       |       |      |      |
| Method       | 1(%)  | 2(%)  | 3(%)  | 4(%)  | 5(%)  | 6(%)  | 7(%)  | M    | SD   |
| LDA+TO       | 4.31  | 4.31  | 12.93 | 25.86 | 30.17 | 14.66 | 7.76  | 4.48 | 1.43 |
| Story Forest | 6.03  | 23.28 | 13.79 | 25.00 | 8.62  | 15.52 | 7.76  | 3.84 | 1.73 |
| EventKG      | 12.07 | 12.07 | 10.34 | 31.03 | 15.52 | 11.21 | 7.76  | 3.91 | 1.72 |
| EventNET     | 5.17  | 6.03  | 12.07 | 16.38 | 18.97 | 22.41 | 18.97 | 4.81 | 1.72 |
| LSH-GEFR     | 2.59  | 7.76  | 5.17  | 19.83 | 24.14 | 22.41 | 18.10 | 4.95 | 1.57 |
| P8           |       |       |       |       |       |       |       |      |      |
| Method       | 1(%)  | 2(%)  | 3(%)  | 4(%)  | 5(%)  | 6(%)  | 7(%)  | M    | SD   |
| LDA+TO       | 3.45  | 5.17  | 17.24 | 27.59 | 23.28 | 12.07 | 11.21 | 4.43 | 1.49 |
| Story Forest | 9.48  | 17.24 | 13.79 | 18.97 | 17.24 | 15.52 | 7.76  | 3.95 | 1.78 |
| EventKG      | 12.93 | 10.34 | 12.07 | 28.45 | 14.66 | 15.52 | 6.03  | 3.92 | 1.73 |
| EventNET     | 6.03  | 9.48  | 12.93 | 13.79 | 17.24 | 18.97 | 21.55 | 4.70 | 1.85 |
| LSH-GEFR     | 4.31  | 6.90  | 12.93 | 12.93 | 19.83 | 20.69 | 22.41 | 4.89 | 1.75 |

| P9           |       |       |       |       |       |       |       |      |      |
|--------------|-------|-------|-------|-------|-------|-------|-------|------|------|
| Method       | 1(%)  | 2(%)  | 3(%)  | 4(%)  | 5(%)  | 6(%)  | 7(%)  | M    | SD   |
| LDA+TO       | 4.31  | 3.45  | 17.24 | 24.14 | 31.03 | 12.07 | 7.76  | 4.41 | 1.42 |
| Story Forest | 7.76  | 12.07 | 10.34 | 21.55 | 13.79 | 21.55 | 12.93 | 4.38 | 1.82 |
| EventKG      | 10.34 | 15.52 | 13.79 | 25.86 | 12.93 | 15.52 | 6.03  | 3.86 | 1.72 |
| EventNET     | 4.31  | 3.45  | 10.34 | 18.97 | 23.28 | 21.55 | 18.10 | 4.91 | 1.59 |
| LSH-GEFR     | 2.59  | 10.34 | 10.34 | 14.66 | 27.59 | 21.55 | 12.93 | 4.71 | 1.60 |
| P10          |       |       |       |       |       |       |       |      |      |
| Method       | 1(%)  | 2(%)  | 3(%)  | 4(%)  | 5(%)  | 6(%)  | 7(%)  | M    | SD   |
| LDA+TO       | 2.59  | 7.76  | 13.79 | 28.45 | 23.28 | 18.97 | 5.17  | 4.40 | 1.41 |
| Story Forest | 9.48  | 12.93 | 18.10 | 15.52 | 17.24 | 18.10 | 8.62  | 4.07 | 1.79 |
| EventKG      | 10.34 | 12.07 | 15.52 | 24.14 | 18.97 | 13.79 | 5.17  | 3.91 | 1.66 |
| EventNET     | 8.62  | 10.34 | 10.34 | 14.66 | 14.66 | 19.83 | 21.55 | 4.62 | 1.95 |
| LSH-GEFR     | 2.59  | 2.59  | 6.03  | 19.83 | 25.00 | 27.59 | 16.38 | 5.10 | 1.42 |
| P11          |       |       |       |       |       |       |       |      |      |
| Method       | 1(%)  | 2(%)  | 3(%)  | 4(%)  | 5(%)  | 6(%)  | 7(%)  | M    | SD   |
| LDA+TO       | 1.72  | 3.45  | 10.34 | 22.41 | 37.93 | 18.10 | 6.03  | 4.70 | 1.25 |
| Story Forest | 12.07 | 18.97 | 12.93 | 18.97 | 12.93 | 18.10 | 6.03  | 3.80 | 1.83 |
| EventKG      | 10.34 | 14.66 | 9.48  | 25.86 | 21.55 | 12.07 | 6.03  | 3.94 | 1.69 |
| EventNET     | 3.45  | 7.76  | 10.34 | 23.28 | 15.52 | 20.69 | 18.97 | 4.78 | 1.68 |
| LSH-GEFR     | 5.17  | 7.76  | 6.90  | 17.24 | 25.00 | 20.69 | 17.24 | 4.80 | 1.68 |
| P12          |       |       |       |       |       |       |       |      |      |
| Method       | 1(%)  | 2(%)  | 3(%)  | 4(%)  | 5(%)  | 6(%)  | 7(%)  | M    | SD   |
| LDA+TO       | 1.72  | 10.34 | 12.07 | 25.00 | 31.03 | 11.21 | 8.62  | 4.41 | 1.43 |
| Story Forest | 8.62  | 18.97 | 12.07 | 20.69 | 12.07 | 21.55 | 6.03  | 3.97 | 1.78 |
| EventKG      | 8.62  | 17.24 | 9.48  | 22.41 | 20.69 | 14.66 | 6.90  | 4.01 | 1.72 |
| EventNET     | 5.17  | 3.45  | 11.21 | 20.69 | 17.24 | 25.00 | 17.24 | 4.85 | 1.65 |
| LSH-GEFR     | 5.17  | 4.31  | 11.21 | 17.24 | 21.55 | 23.28 | 17.24 | 4.84 | 1.65 |
